# Supplementary material for: Co-factor-free aggregation of tau into seeding-competent RNA-sequestering amyloid fibrils
Source: PubMed Central journal article supplement (PMC8270918; doi:10.1038/s41467-021-24362-8), 2021-07-09
Supplement: 41467_2021_24362_MOESM1_ESM.pdf [file 41467_2021_24362_MOESM1_ESM.pdf]

**Supplementary information for**

**Co-factor-free aggregation of tau into seeding-competent RNA-sequestering amyloid fibrils**

Pijush Chakraborty, Gwladys Rivière, Shu Liu, Alain Ibáñez de Opakua, Riza Dervişoğlu, Alina Hebestreit, Loren B. Andreas, Ina M. Vorberg and Markus Zweckstetter

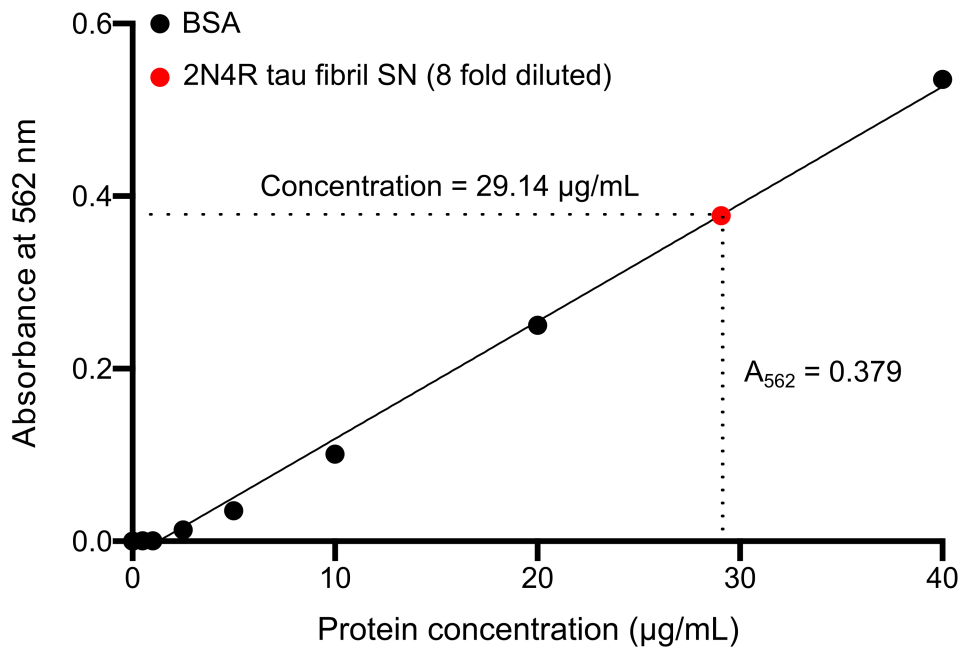

Concentration of 2N4R tau before aggregation = 1.146 mg/mL

Concentration of 2N4R tau in SN =  $(29.14 \times 8) \mu\text{g/mL} = 0.233 \text{ mg/mL}$

~ 80 % 2N4R tau aggregated

**Supplementary Fig. 1** | Determination of the concentration of 2N4R tau present in the supernatant (SN; red dot; 8-fold dilution) after aggregation in the absence of heparin. Concentrations were determined using the BCA assay. Absorbance values, which were detected for BSA standard solutions with known concentrations, are shown in black.

| Sequence        | Observed m/z | Absolute mass (Da) | Charge | TIC      | Sequence               | Observed m/z | Absolute mass (Da) | Charge | TIC      |
|-----------------|--------------|--------------------|--------|----------|------------------------|--------------|--------------------|--------|----------|
| LQTAPVPMPLK     | 663.3665     | 1,324.72           | 2      | 1085120  | KDLSNVQSK              | 566.325      | 1,130.64           | 2      | 688486   |
| LQTAPVPMPLK     | 663.3668     | 1,324.72           | 2      | 488941   | KDLSNVQSK              | 377.8875     | 1,130.64           | 3      | 1543860  |
| IGSTENLK        | 431.2404     | 860.4663           | 2      | 8.25E+07 | KDLSNVQSK              | 566.3237     | 1,130.63           | 2      | 1.02E+07 |
| IGSTENLK        | 431.2383     | 860.4621           | 2      | 4.33E+07 | KDLSNVQSK              | 377.8856     | 1,130.63           | 3      | 1.48E+07 |
| IGSTENLK        | 431.2396     | 860.4646           | 2      | 3.77E+07 | KDLSNVQSK              | 377.8873     | 1,130.64           | 3      | 1270980  |
| IGSTENLK        | 431.2394     | 860.4643           | 2      | 7759340  | KDLSNVQSK              | 377.8866     | 1,130.64           | 3      | 2090420  |
| IGSTENLK        | 431.2393     | 860.464            | 2      | 1.84E+07 | KDLSNVQSK              | 377.8857     | 1,130.64           | 3      | 8531420  |
| IGSTENLK        | 431.2398     | 860.4651           | 2      | 5.58E+07 | KDLSNVQSK              | 566.3245     | 1,130.63           | 2      | 564889   |
| IGSTENLK        | 431.2397     | 860.4648           | 2      | 370087   | KDLSNVQSK              | 377.887      | 1,130.64           | 3      | 1.03E+08 |
| IGSTENLK        | 431.2382     | 860.4618           | 2      | 899899   | KDLSNVQSK              | 566.3256     | 1,130.64           | 2      | 424992   |
| IGSTENLK        | 431.2389     | 860.4632           | 2      | 623917   | KDLSNVQSK              | 377.8865     | 1,130.64           | 3      | 1810990  |
| IGSTENLK        | 431.2384     | 860.4623           | 2      | 451482   | KDLSNVQSK              | 377.8867     | 1,130.64           | 3      | 5202380  |
| IGSTENLK        | 431.2404     | 860.4663           | 2      | 380415   | KDLSNVQSK              | 566.3248     | 1,130.64           | 2      | 389941   |
| IGSTENLK        | 431.2386     | 860.4627           | 2      | 846224   | KDLSNVQSK              | 566.3263     | 1,130.64           | 2      | 2100210  |
| IGSTENLKHQPGGGK | 508.2739     | 1,521.80           | 3      | 259432   | KDLSNVQSK              | 377.8846     | 1,130.63           | 3      | 3.19E+07 |
| IGSTENLKHQPGGGK | 381.4566     | 1,521.80           | 4      | 184486   | KDLSNVQSK              | 377.8861     | 1,130.64           | 3      | 2383330  |
| HQPGGGKQIINK    | 459.2663     | 1,374.78           | 3      | 4335000  | KDLSNVQSK              | 377.8848     | 1,130.63           | 3      | 1.29E+08 |
| HQPGGGKQIINK    | 459.2674     | 1,374.78           | 3      | 887532   | KDLSNVQSK              | 377.8873     | 1,130.64           | 3      | 3748570  |
| HQPGGGKQIINK    | 459.2677     | 1,374.78           | 3      | 490639   | KDLSNVQSK              | 377.8847     | 1,130.63           | 3      | 2.92E+07 |
| HQPGGGKQIINK    | 459.2662     | 1,374.78           | 3      | 712940   | KDLSNVQSK              | 566.3254     | 1,130.64           | 2      | 398022   |
| HQPGGGKQIINK    | 459.2674     | 1,374.78           | 3      | 397008   | KDLSNVQSK              | 377.8855     | 1,130.63           | 3      | 8.94E+07 |
| VQIINK          | 421.7779     | 841.5412           | 2      | 1974720  | KDLSNVQSK              | 377.8847     | 1,130.63           | 3      | 787084   |
| VQIINK          | 421.7784     | 841.5423           | 2      | 2.86E+07 | KDLSNVQSK              | 377.885      | 1,130.63           | 3      | 3073160  |
| VQIINK          | 421.7774     | 841.5402           | 2      | 5661730  | KDLSNVQSK              | 377.8874     | 1,130.64           | 3      | 4185900  |
| VQIINK          | 421.7774     | 841.5402           | 2      | 2975050  | KDLSNVQSK              | 377.8843     | 1,130.63           | 3      | 9419510  |
| VQIINK          | 421.7784     | 841.5423           | 2      | 517547   | KDLSNVQSK              | 377.8844     | 1,130.63           | 3      | 8.83E+07 |
| VQIINK          | 421.779      | 841.5434           | 2      | 2.54E+07 | KDLSNVQSK              | 377.8846     | 1,130.63           | 3      | 1.60E+07 |
| VQIINK          | 421.7782     | 841.5419           | 2      | 1.11E+07 | KDLSNVQSK              | 377.8857     | 1,130.64           | 3      | 1774280  |
| VQIINK          | 421.7787     | 841.5428           | 2      | 2.52E+07 | KDLSNVQSK              | 377.886      | 1,130.64           | 3      | 1.05E+07 |
| VQIINK          | 421.7789     | 841.5432           | 2      | 881426   | KDLSNVQSK              | 377.8846     | 1,130.63           | 3      | 1374120  |
| VQIINK          | 421.7775     | 841.5404           | 2      | 2254640  | KDLSNVQSK              | 566.3251     | 1,130.64           | 2      | 357209   |
| VQIINK          | 421.7777     | 841.5408           | 2      | 2.51E+07 | KDLSNVQSK              | 566.3255     | 1,130.64           | 2      | 245725   |
| VQIINK          | 421.7781     | 841.5415           | 2      | 2.88E+07 | KDLSNVQSK              | 566.3232     | 1,130.63           | 2      | 389543   |
| VQIINK          | 421.7788     | 841.5431           | 2      | 1766970  | KDLSNVQSK              | 377.8852     | 1,130.63           | 3      | 1125230  |
| VQIINK          | 421.778      | 841.5414           | 2      | 1.80E+07 | KDLSNVQSK              | 566.3254     | 1,130.64           | 2      | 234322   |
| VQIINK          | 421.7773     | 841.5401           | 2      | 5624820  | KDLSNVQSK              | 566.3273     | 1,130.64           | 2      | 442197   |
| VQIINK          | 421.7789     | 841.5432           | 2      | 3.11E+07 | KDLSNVQSK              | 566.3274     | 1,130.64           | 2      | 240791   |
| VQIINK          | 421.778      | 841.5415           | 2      | 1221890  | LDLSNVQSK              | 502.2765     | 1,002.54           | 2      | 1.10E+08 |
| VQIINK          | 421.7782     | 841.5418           | 2      | 423916   | LDLSNVQSK              | 502.2768     | 1,002.54           | 2      | 2.53E+07 |
| VQIINK          | 421.7779     | 841.5412           | 2      | 447356   | LDLSNVQSK              | 502.2781     | 1,002.54           | 2      | 2.82E+07 |
| VQIINK          | 421.7775     | 841.5404           | 2      | 459569   | LDLSNVQSK              | 502.2783     | 1,002.54           | 2      | 1.07E+07 |
| VQIINK          | 421.7788     | 841.5431           | 2      | 536818   | LDLSNVQSK              | 502.2776     | 1,002.54           | 2      | 534743   |
| VQIINKLDLSNVQSK | 457.5269     | 1,826.08           | 4      | 623597   | LDLSNVQSK              | 502.2746     | 1,002.53           | 2      | 3000260  |
| QIINK           | 372.2438     | 742.4731           | 2      | 1779580  | LDLSNVQSK              | 502.2748     | 1,002.54           | 2      | 3.65E+07 |
| QIINK           | 372.2432     | 742.4719           | 2      | 1993940  | LDLSNVQSK              | 502.2784     | 1,002.54           | 2      | 5150750  |
| KDLSNVQ         | 458.7625     | 915.5105           | 2      | 1086550  | LDLSNVQSK              | 502.2776     | 1,002.54           | 2      | 708110   |
| KDLSNVQSK       | 566.3255     | 1,130.64           | 2      | 1.44E+07 | LDLSNVQSK              | 502.2777     | 1,002.54           | 2      | 1712560  |
| KDLSNVQSK       | 566.3273     | 1,130.64           | 2      | 3897200  | LDLSNVQSK              | 502.2783     | 1,002.54           | 2      | 2509220  |
| KDLSNVQSK       | 566.326      | 1,130.64           | 2      | 7390680  | LDLSNVQSK              | 502.2787     | 1,002.54           | 2      | 777637   |
| KDLSNVQSK       | 566.3244     | 1,130.63           | 2      | 9.73E+07 | LDLSNVQSK              | 502.2791     | 1,002.54           | 2      | 639433   |
| KDLSNVQSK       | 566.3249     | 1,130.64           | 2      | 1.12E+08 | LDLSNVQSK              | 502.2792     | 1,002.54           | 2      | 1122120  |
| KDLSNVQSK       | 566.3258     | 1,130.64           | 2      | 1482140  | LDLSNVQSK              | 502.2781     | 1,002.54           | 2      | 328470   |
| KDLSNVQSK       | 566.3266     | 1,130.64           | 2      | 1472020  | LDLSNVQSK              | 502.2778     | 1,002.54           | 2      | 345601   |
| KDLSNVQSK       | 566.323      | 1,130.63           | 2      | 4895010  | LDLSNVQSK              | 502.2767     | 1,002.54           | 2      | 951925   |
| KDLSNVQSK       | 566.3239     | 1,130.63           | 2      | 1.53E+07 | LDLSNVQSK              | 502.2763     | 1,002.54           | 2      | 407844   |
| KDLSNVQSK       | 566.3268     | 1,130.64           | 2      | 996572   | CGSKDNIK               | 461.229      | 920.4434           | 2      | 1325970  |
| KDLSNVQSK       | 566.3272     | 1,130.64           | 2      | 1049920  | CGSKDNIK               | 461.2292     | 920.4438           | 2      | 1558090  |
| KDLSNVQSK       | 566.3276     | 1,130.64           | 2      | 5839370  | CGSKDNIK               | 461.2301     | 920.4455           | 2      | 1260580  |
| KDLSNVQSK       | 566.324      | 1,130.63           | 2      | 3.11E+07 | CGSKDNIK               | 461.2299     | 920.4452           | 2      | 1359890  |
| KDLSNVQSK       | 566.3257     | 1,130.64           | 2      | 1630260  | CGSKDNIK               | 461.229      | 920.4434           | 2      | 928951   |
| KDLSNVQSK       | 566.3244     | 1,130.63           | 2      | 1.17E+07 | DNKHVPGGGSVQIVYKPVDSLK | 613.3406     | 2,449.33           | 4      | 402953   |
| KDLSNVQSK       | 566.327      | 1,130.64           | 2      | 621179   | HVPGGGSVQ              | 419.2169     | 836.4192           | 2      | 5175300  |
| KDLSNVQSK       | 566.3265     | 1,130.64           | 2      | 1641550  | HVPGGGSVQIVY           | 606.8246     | 1,211.63           | 2      | 5196730  |
| KDLSNVQSK       | 566.3248     | 1,130.64           | 2      | 7.11E+07 | HVPGGGSVQIVY           | 606.8227     | 1,211.63           | 2      | 1927530  |
| KDLSNVQSK       | 566.3248     | 1,130.64           | 2      | 3.45E+07 | HVPGGGSVQIVY           | 606.8281     | 1,211.64           | 2      | 607544   |
| KDLSNVQSK       | 566.3266     | 1,130.64           | 2      | 2668430  | HVPGGGSVQIVY           | 606.8248     | 1,211.64           | 2      | 658417   |

| Sequence          | Observed m/z | Absolute mass (Da) | Charge | TIC      | Sequence            | Observed m/z | Absolute mass (Da) | Charge | TIC       |
|-------------------|--------------|--------------------|--------|----------|---------------------|--------------|--------------------|--------|-----------|
| HVPGGGSVQIVYK     | 447.5846     | 1,339.73           | 3      | 3309080  | CGSLGNIHHK          | 374.8553     | 1,121.54           | 3      | 889273    |
| HVPGGGSVQIVYK     | 447.5861     | 1,339.74           | 3      | 1744260  | CGSLGNIHHKPGGGQVEVK | 658.672      | 1,972.99           | 3      | 1137040   |
| HVPGGGSVQIVYK     | 447.5854     | 1,339.73           | 3      | 2346670  | CGSLGNIHHKPGGGQVEVK | 658.6739     | 1,973.00           | 3      | 1327920   |
| HVPGGGSVQIVYK     | 670.8753     | 1,339.74           | 2      | 2555930  | CGSLGNIHHKPGGGQVEVK | 658.6737     | 1,973.00           | 3      | 992953    |
| HVPGGGSVQIVYK     | 670.8753     | 1,339.74           | 2      | 1447930  | CGSLGNIHHKPGGGQVEVK | 494.2573     | 1,973.00           | 4      | 3370610   |
| HVPGGGSVQIVYK     | 670.873      | 1,339.73           | 2      | 2009850  | CGSLGNIHHKPGGGQVEVK | 658.6732     | 1,973.00           | 3      | 1395720   |
| HVPGGGSVQIVYKPVDL | 588.9972     | 1,763.97           | 3      | 1244210  | CGSLGNIHHKPGGGQVEVK | 658.6652     | 1,972.97           | 3      | 1190500   |
| HVPGGGSVQIVYKPVDL | 588.9971     | 1,763.97           | 3      | 1857990  | CGSLGNIHHKPGGGQVEVK | 658.6742     | 1,973.00           | 3      | 1297690   |
| HVPGGGSVQIVYKPVDL | 660.7059     | 1,979.10           | 3      | 4.06E+07 | CGSLGNIHHKPGGGQVEVK | 658.6736     | 1,973.00           | 3      | 1622510   |
| HVPGGGSVQIVYKPVDL | 990.5541     | 1,979.09           | 2      | 3740060  | CGSLGNIHHKPGGGQVEVK | 658.6757     | 1,973.01           | 3      | 269325    |
| HVPGGGSVQIVYKPVDL | 495.7817     | 1,979.10           | 4      | 9258010  | CGSLGNIHHKPGGGQVEVK | 494.2581     | 1,973.00           | 4      | 2476020   |
| HVPGGGSVQIVYKPVDL | 990.557      | 1,979.10           | 2      | 6676660  | CGSLGNIHHKPGGGQVEVK | 658.6744     | 1,973.00           | 3      | 374600    |
| HVPGGGSVQIVYKPVDL | 495.7825     | 1,979.10           | 4      | 3428870  | CGSLGNIHHKPGGGQVEVK | 658.6737     | 1,973.00           | 3      | 932126    |
| HVPGGGSVQIVYKPVDL | 495.7829     | 1,979.10           | 4      | 2320600  | CGSLGNIHHKPGGGQVEVK | 494.2572     | 1,973.00           | 4      | 4194500   |
| HVPGGGSVQIVYKPVDL | 495.783      | 1,979.10           | 4      | 2371390  | CGSLGNIHHKPGGGQVEVK | 494.257      | 1,973.00           | 4      | 3819660   |
| HVPGGGSVQIVYKPVDL | 660.7048     | 1,979.09           | 3      | 3.59E+08 | CGSLGNIHHKPGGGQVEVK | 658.6749     | 1,973.00           | 3      | 498095    |
| HVPGGGSVQIVYKPVDL | 495.7805     | 1,979.09           | 4      | 2914550  | CGSLGNIHHKPGGGQVEVK | 658.6703     | 1,972.99           | 3      | 1691620   |
| HVPGGGSVQIVYKPVDL | 660.7063     | 1,979.10           | 3      | 9921910  | CGSLGNIHHKPGGGQVEVK | 494.2565     | 1,973.00           | 4      | 2067020   |
| HVPGGGSVQIVYKPVDL | 495.783      | 1,979.10           | 4      | 5478000  | CGSLGNIHHKPGGGQVEVK | 494.2576     | 1,973.00           | 4      | 1971720   |
| HVPGGGSVQIVYKPVDL | 495.7815     | 1,979.10           | 4      | 3192610  | CGSLGNIHHKPGGGQVEVK | 494.2567     | 1,973.00           | 4      | 631635    |
| HVPGGGSVQIVYKPVDL | 495.7822     | 1,979.10           | 4      | 4334490  | CGSLGNIHHKPGGGQVEVK | 494.2575     | 1,973.00           | 4      | 3016150   |
| HVPGGGSVQIVYKPVDL | 495.7813     | 1,979.10           | 4      | 2.57E+07 | CGSLGNIHHKPGGGQVEVK | 494.2559     | 1,972.99           | 4      | 2382460   |
| HVPGGGSVQIVYKPVDL | 660.7051     | 1,979.09           | 3      | 1.48E+08 | CGSLGNIHHKPGGGQVEVK | 494.2588     | 1,973.01           | 4      | 1049420   |
| HVPGGGSVQIVYKPVDL | 495.7816     | 1,979.10           | 4      | 1.11E+07 | CGSLGNIHHKPGGGQVEVK | 494.2595     | 1,973.01           | 4      | 1020780   |
| HVPGGGSVQIVYKPVDL | 495.7821     | 1,979.10           | 4      | 2.84E+07 | CGSLGNIHHKPGGGQVEVK | 658.6698     | 1,972.99           | 3      | 499499    |
| HVPGGGSVQIVYKPVDL | 495.7801     | 1,979.09           | 4      | 7.49E+07 | CGSLGNIHHKPGGGQVEVK | 494.2555     | 1,972.99           | 4      | 843446    |
| HVPGGGSVQIVYKPVDL | 660.7036     | 1,979.09           | 3      | 4.47E+08 | HKPGGGQVEVK         | 379.2153     | 1,134.62           | 3      | 788203    |
| HVPGGGSVQIVYKPVDL | 495.78       | 1,979.09           | 4      | 2.57E+08 | HKPGGGQVEVK         | 379.213      | 1,134.62           | 3      | 943892    |
| HVPGGGSVQIVYKPVDL | 495.7807     | 1,979.09           | 4      | 6.33E+07 | KPGGGQVEVK          | 499.788      | 997.5615           | 2      | 320523    |
| HVPGGGSVQIVYKPVDL | 660.7083     | 1,979.10           | 3      | 1.23E+07 | KPGGGQVEVK          | 499.7853     | 997.5561           | 2      | 93,917.00 |
| HVPGGGSVQIVYKPVDL | 660.7052     | 1,979.09           | 3      | 1.43E+08 | PGGGQVEVK           | 435.7387     | 869.4629           | 2      | 675391    |
| HVPGGGSVQIVYKPVDL | 495.7815     | 1,979.10           | 4      | 2583980  | PGGGQVEVK           | 435.7404     | 869.4663           | 2      | 1.46E+07  |
| HVPGGGSVQIVYKPVDL | 990.5507     | 1,979.09           | 2      | 2008380  | PGGGQVEVK           | 435.7382     | 869.4619           | 2      | 1262160   |
| HVPGGGSVQIVYKPVDL | 495.7827     | 1,979.10           | 4      | 2159700  | PGGGQVEVK           | 435.7381     | 869.4617           | 2      | 2111660   |
| HVPGGGSVQIVYKPVDL | 495.7801     | 1,979.09           | 4      | 3.08E+08 | PGGGQVEVK           | 435.7405     | 869.4665           | 2      | 2.70E+07  |
| HVPGGGSVQIVYKPVDL | 990.5532     | 1,979.09           | 2      | 7801890  | PGGGQVEVK           | 435.7384     | 869.4622           | 2      | 4518720   |
| HVPGGGSVQIVYKPVDL | 660.7071     | 1,979.10           | 3      | 1.17E+07 | PGGGQVEVK           | 435.739      | 869.4635           | 2      | 1.56E+07  |
| HVPGGGSVQIVYKPVDL | 990.5562     | 1,979.10           | 2      | 381200   | PGGGQVEVK           | 435.7386     | 869.4627           | 2      | 835934    |
| HVPGGGSVQIVYKPVDL | 660.7081     | 1,979.10           | 3      | 1.13E+07 | PGGGQVEVK           | 435.7368     | 869.459            | 2      | 9522350   |
| HVPGGGSVQIVYKPVDL | 660.7067     | 1,979.10           | 3      | 1.17E+07 | PGGGQVEVK           | 435.742      | 869.4694           | 2      | 528237    |
| HVPGGGSVQIVYKPVDL | 660.7082     | 1,979.10           | 3      | 3.74E+07 | GGGQVEVK            | 387.2131     | 772.4116           | 2      | 322668    |
| HVPGGGSVQIVYKPVDL | 495.7822     | 1,979.10           | 4      | 2446550  | GGQVEVK             | 358.7026     | 715.3906           | 2      | 595542    |
| HVPGGGSVQIVYKPVDL | 660.7058     | 1,979.10           | 3      | 1.38E+07 | SEKLDK              | 433.7355     | 865.4564           | 2      | 2037840   |
| HVPGGGSVQIVYKPVDL | 660.7045     | 1,979.09           | 3      | 2311750  | SEKLDK              | 433.7361     | 865.4577           | 2      | 1644280   |
| GGGSVQIVYKPVDL    | 549.6429     | 1,645.91           | 3      | 945519   | SEKLDK              | 433.736      | 865.4574           | 2      | 2002940   |
| GGSVQIVYKPVDL     | 530.6381     | 1,588.89           | 3      | 1860150  | SEKLDK              | 433.7367     | 865.4588           | 2      | 782481    |
| GGSVQIVYKPVDL     | 530.6366     | 1,588.89           | 3      | 2202040  | SEKLDK              | 433.7353     | 865.456            | 2      | 1552130   |
| GGSVQIVYKPVDL     | 511.6294     | 1,531.87           | 3      | 3717640  | SEKLDK              | 433.7364     | 865.4582           | 2      | 713546    |
| GGSVQIVYKPVDL     | 511.6291     | 1,531.87           | 3      | 1347090  | SEKLDK              | 433.7361     | 865.4576           | 2      | 1239020   |
| SVQIVYKPVDL       | 492.6227     | 1,474.85           | 3      | 1216430  | SEKLDK              | 433.7363     | 865.4581           | 2      | 370496    |
| SVQIVYKPVDL       | 738.4289     | 1,474.84           | 2      | 815127   | SEKLDK              | 433.7362     | 865.4579           | 2      | 499564    |
| SVQIVYKPVDL       | 738.4314     | 1,474.85           | 2      | 979506   | LDKDR               | 397.2141     | 792.4137           | 2      | 1977410   |
| SVQIVYKPVDL       | 492.6235     | 1,474.85           | 3      | 1558740  | LDKDR               | 397.2155     | 792.4164           | 2      | 1013110   |
| IVYKPVDL          | 387.9027     | 1,160.69           | 3      | 840122   | LDKDR               | 397.2157     | 792.4168           | 2      | 836590    |
| IVYKPVDL          | 387.903      | 1,160.69           | 3      | 922994   | LDKDR               | 397.2175     | 792.4204           | 2      | 1887930   |
| KPVDL             | 393.7404     | 785.4662           | 2      | 555221   | LDKDR               | 397.2141     | 792.4136           | 2      | 917648    |
| KPVDL             | 393.7412     | 785.4678           | 2      | 387968   | IGSLDNITHVPGGGNK    | 526.9511     | 1,577.83           | 3      | 1608920   |
| KPVDL             | 393.7415     | 785.4685           | 2      | 568540   | IGSLDNITHVPGGGNK    | 526.9508     | 1,577.83           | 3      | 1536100   |
| KPVDL             | 393.74       | 785.4654           | 2      | 591744   | IGSLDNITHVPGGGNK    | 526.951      | 1,577.83           | 3      | 489459    |
| KPVDL             | 393.7413     | 785.468            | 2      | 430025   | IGSLDNITHVPGGGNK    | 526.9509     | 1,577.83           | 3      | 689049    |
| KPVDL             | 393.7404     | 785.4663           | 2      | 579873   | IGSLDNITHVPGGGNKK   | 569.6486     | 1,705.92           | 3      | 440431    |
| KPVDL             | 393.7396     | 785.4647           | 2      | 364953   | IGSLDNITHVPGGGNKK   | 569.6498     | 1,705.93           | 3      | 420993    |
| KPVDL             | 393.7407     | 785.4668           | 2      | 466148   | KIETHK              | 378.2239     | 754.4333           | 2      | 130320    |
| KPVDL             | 393.7422     | 785.4699           | 2      | 339201   | KIETHK              | 378.2263     | 754.4381           | 2      | 125368    |
| KPVDL             | 393.7424     | 785.4702           | 2      | 816433   | KIETHK              | 378.2264     | 754.4382           | 2      | 693732    |
| CGSLGNIHHK        | 374.8554     | 1,121.54           | 3      | 738854   |                     |              |                    |        |           |

**Supplementary Fig. 2** | Details of the peptides detected (shown in Fig. 2c, black) by enzymatic digestion of the trypsin protected core (Fig. 2b) of heparin-induced 2N4R tau fibrils.

| Sequence                | Observed m/z | Absolute mass (Da) | Charge | TIC      | Sequence                | Observed m/z | Absolute mass (Da) | Charge | TIC      |
|-------------------------|--------------|--------------------|--------|----------|-------------------------|--------------|--------------------|--------|----------|
| AKTDHGAEIVYK            | 666.352      | 1,330.69           | 2      | 2112160  | HVPGGGSVQIVYKPVDSLK     | 660.7082     | 1,979.10           | 3      | 2811180  |
| AKTDHGAEIVYK            | 666.3525     | 1,330.69           | 2      | 1441290  | HVPGGGSVQIVYKPVDSLK     | 660.7073     | 1,979.10           | 3      | 1991730  |
| AKTDHGAEIVYK            | 444.5705     | 1,330.69           | 3      | 2.02E+07 | HVPGGGSVQIVYKPVDSLK     | 660.7075     | 1,979.10           | 3      | 2627530  |
| AKTDHGAEIVYK            | 444.57       | 1,330.69           | 3      | 5533990  | HVPGGGSVQIVYKPVDSLK     | 660.7018     | 1,979.08           | 3      | 4.21E+09 |
| CGSLGNIHHKPGGGQVEVK     | 987.5019     | 1,972.99           | 2      | 458225   | HVPGGGSVQIVYKPVDSLK     | 660.7077     | 1,979.10           | 3      | 2581060  |
| CGSLGNIHHKPGGGQVEVK     | 658.6707     | 1,972.99           | 3      | 2941340  | HVPGGGSVQIVYKPVDSLK     | 495.7808     | 1,979.09           | 4      | 532325   |
| CGSLGNIHHKPGGGQVEVK     | 494.2547     | 1,972.99           | 4      | 1580130  | HVPGGGSVQIVYKPVDSLK     | 660.7045     | 1,979.09           | 3      | 2597390  |
| DNIKHVPGGGSVQIVYKPVDSLK | 817.4449     | 2,449.31           | 3      | 2528420  | HVPGGGSVQIVYKPVDSLK     | 495.7801     | 1,979.09           | 4      | 636190   |
| DNIKHVPGGGSVQIVYKPVDSLK | 613.3411     | 2,449.34           | 4      | 7021630  | HVPGGGSVQIVYKPVDSLK     | 495.781      | 1,979.09           | 4      | 532791   |
| DNIKHVPGGGSVQIVYKPVDSLK | 817.4438     | 2,449.31           | 3      | 1155600  | HVPGGGSVQIVYKPVDSLK     | 495.7811     | 1,979.10           | 4      | 714262   |
| DNIKHVPGGGSVQIVYKPVDSLK | 613.3351     | 2,449.31           | 4      | 5540500  | HVPGGGSVQIVYKPVDSLK     | 495.7824     | 1,979.10           | 4      | 482556   |
| DRVQSKIGSLDNITHVPGGGNK  | 764.7397     | 2,291.20           | 3      | 3097320  | HVPGGGSVQIVYKPVDSLK     | 660.7021     | 1,979.08           | 3      | 1.16E+09 |
| DRVQSKIGSLDNITHVPGGGNK  | 459.2466     | 2,291.20           | 5      | 2628490  | HVPGGGSVQIVYKPVDSLK     | 495.7807     | 1,979.09           | 4      | 581133   |
| DRVQSKIGSLDNITHVPGGGNK  | 484.8668     | 2,419.30           | 5      | 1873910  | HVPGGGSVQIVYKPVDSLK     | 495.7804     | 1,979.09           | 4      | 906451   |
| HQPGGGKVQIINK           | 459.2658     | 1,374.78           | 3      | 690270   | HVPGGGSVQIVYKPVDSLK     | 990.553      | 1,979.09           | 2      | 501700   |
| HQPGGGKVQIINK           | 376.7255     | 1,502.87           | 4      | 352294   | HVPGGGSVQIVYKPVDSLK     | 660.7021     | 1,979.08           | 3      | 2.84E+07 |
| HVPGGGSVQIVYKPVDSLK     | 990.5506     | 1,979.09           | 2      | 1.50E+07 | HVPGGGSVQIVYKPVDSLK     | 495.7809     | 1,979.09           | 4      | 639708   |
| HVPGGGSVQIVYKPVDSLK     | 660.704      | 1,979.09           | 3      | 8369030  | HVPGGGSVQIVYKPVDSLK     | 495.7788     | 1,979.09           | 4      | 2486670  |
| HVPGGGSVQIVYKPVDSLK     | 660.7055     | 1,979.09           | 3      | 5284610  | HVPGGGSVQIVYKPVDSLKVTSK | 599.5907     | 2,394.33           | 4      | 2.31E+07 |
| HVPGGGSVQIVYKPVDSLK     | 660.7059     | 1,979.10           | 3      | 7011870  | HVPGGGSVQIVYKPVDSLKVTSK | 799.1186     | 2,394.33           | 3      | 4130730  |
| HVPGGGSVQIVYKPVDSLK     | 660.7037     | 1,979.09           | 3      | 4.69E+07 | IETHKLTFRENAK           | 793.9355     | 1,585.86           | 2      | 2190220  |
| HVPGGGSVQIVYKPVDSLK     | 495.7793     | 1,979.09           | 4      | 949283   | IETHKLTFRENAK           | 529.6262     | 1,585.86           | 3      | 1.15E+07 |
| HVPGGGSVQIVYKPVDSLK     | 660.7061     | 1,979.10           | 3      | 2224980  | IETHKLTFRENAKAK         | 596.0042     | 1,784.99           | 3      | 1762750  |
| HVPGGGSVQIVYKPVDSLK     | 660.7016     | 1,979.08           | 3      | 1.06E+07 | IGSLDNITHVPGGGNK        | 789.9158     | 1,577.82           | 2      | 3.73E+08 |
| HVPGGGSVQIVYKPVDSLK     | 660.7066     | 1,979.10           | 3      | 3102850  | IGSLDNITHVPGGGNK        | 789.9163     | 1,577.82           | 2      | 3.21E+07 |
| HVPGGGSVQIVYKPVDSLK     | 495.7789     | 1,979.09           | 4      | 1561800  | IGSLDNITHVPGGGNK        | 789.9152     | 1,577.82           | 2      | 9.96E+08 |
| HVPGGGSVQIVYKPVDSLK     | 660.7066     | 1,979.10           | 3      | 2940350  | IGSLDNITHVPGGGNK        | 789.9168     | 1,577.82           | 2      | 810409   |
| HVPGGGSVQIVYKPVDSLK     | 660.7041     | 1,979.09           | 3      | 1.25E+07 | IGSLDNITHVPGGGNK        | 526.9493     | 1,577.83           | 3      | 1651830  |
| HVPGGGSVQIVYKPVDSLK     | 495.7804     | 1,979.09           | 4      | 722816   | IGSLDNITHVPGGGNK        | 789.9173     | 1,577.82           | 2      | 2651900  |
| HVPGGGSVQIVYKPVDSLK     | 660.7077     | 1,979.10           | 3      | 2105500  | IGSLDNITHVPGGGNK        | 526.9488     | 1,577.82           | 3      | 2066100  |
| HVPGGGSVQIVYKPVDSLK     | 660.7056     | 1,979.09           | 3      | 3327480  | IGSLDNITHVPGGGNK        | 526.9498     | 1,577.83           | 3      | 1975390  |
| HVPGGGSVQIVYKPVDSLK     | 660.7067     | 1,979.10           | 3      | 1646850  | IGSLDNITHVPGGGNK        | 789.9175     | 1,577.82           | 2      | 5733840  |
| HVPGGGSVQIVYKPVDSLK     | 495.7806     | 1,979.09           | 4      | 1388860  | IGSLDNITHVPGGGNK        | 526.9476     | 1,577.82           | 3      | 1.48E+07 |
| HVPGGGSVQIVYKPVDSLK     | 660.7051     | 1,979.09           | 3      | 4058520  | IGSLDNITHVPGGGNK        | 526.9492     | 1,577.83           | 3      | 1.53E+08 |
| HVPGGGSVQIVYKPVDSLK     | 660.7028     | 1,979.09           | 3      | 5430780  | IGSLDNITHVPGGGNK        | 526.9499     | 1,577.83           | 3      | 2.83E+09 |
| HVPGGGSVQIVYKPVDSLK     | 495.7783     | 1,979.08           | 4      | 1.01E+09 | IGSLDNITHVPGGGNK        | 526.9506     | 1,577.83           | 3      | 1707060  |
| HVPGGGSVQIVYKPVDSLK     | 495.7788     | 1,979.09           | 4      | 847724   | IGSLDNITHVPGGGNK        | 526.949      | 1,577.83           | 3      | 1876050  |
| HVPGGGSVQIVYKPVDSLK     | 660.7027     | 1,979.09           | 3      | 1.19E+07 | IGSLDNITHVPGGGNK        | 526.9502     | 1,577.83           | 3      | 1906910  |
| HVPGGGSVQIVYKPVDSLK     | 990.5495     | 1,979.08           | 2      | 1409330  | IGSLDNITHVPGGGNK        | 526.9468     | 1,577.82           | 3      | 3882530  |
| HVPGGGSVQIVYKPVDSLK     | 495.7795     | 1,979.09           | 4      | 1153680  | IGSLDNITHVPGGGNK        | 526.9481     | 1,577.82           | 3      | 7.70E+08 |
| HVPGGGSVQIVYKPVDSLK     | 495.7788     | 1,979.09           | 4      | 4.69E+07 | IGSLDNITHVPGGGNK        | 526.9464     | 1,577.82           | 3      | 2791160  |
| HVPGGGSVQIVYKPVDSLK     | 660.7034     | 1,979.09           | 3      | 1.47E+08 | IGSLDNITHVPGGGNK        | 526.9465     | 1,577.82           | 3      | 3411380  |
| HVPGGGSVQIVYKPVDSLK     | 660.7051     | 1,979.09           | 3      | 3208480  | IGSLDNITHVPGGGNK        | 526.946      | 1,577.82           | 3      | 1529550  |
| HVPGGGSVQIVYKPVDSLK     | 660.704      | 1,979.09           | 3      | 2.81E+07 | IGSLDNITHVPGGGNK        | 526.9482     | 1,577.82           | 3      | 1737920  |
| HVPGGGSVQIVYKPVDSLK     | 495.7811     | 1,979.10           | 4      | 771167   | IGSLDNITHVPGGGNK        | 526.9475     | 1,577.82           | 3      | 2552780  |
| HVPGGGSVQIVYKPVDSLK     | 660.7043     | 1,979.09           | 3      | 9691810  | IGSLDNITHVPGGGNK        | 526.9481     | 1,577.82           | 3      | 3058160  |
| HVPGGGSVQIVYKPVDSLK     | 495.7798     | 1,979.09           | 4      | 693595   | IGSLDNITHVPGGGNK        | 526.9468     | 1,577.82           | 3      | 9277720  |
| HVPGGGSVQIVYKPVDSLK     | 495.7801     | 1,979.09           | 4      | 976561   | IGSLDNITHVPGGGNK        | 526.946      | 1,577.82           | 3      | 1.13E+07 |
| HVPGGGSVQIVYKPVDSLK     | 660.7021     | 1,979.08           | 3      | 8.28E+07 | IGSLDNITHVPGGGNK        | 526.9472     | 1,577.82           | 3      | 2636520  |
| HVPGGGSVQIVYKPVDSLK     | 495.7785     | 1,979.08           | 4      | 4.53E+08 | IGSLDNITHVPGGGNK        | 526.9487     | 1,577.82           | 3      | 2985840  |
| HVPGGGSVQIVYKPVDSLK     | 495.7791     | 1,979.09           | 4      | 1097450  | IGSLDNITHVPGGGNK        | 526.9488     | 1,577.82           | 3      | 1773780  |
| HVPGGGSVQIVYKPVDSLK     | 660.7044     | 1,979.09           | 3      | 1.00E+07 | IGSLDNITHVPGGGNK        | 526.9481     | 1,577.82           | 3      | 2273800  |
| HVPGGGSVQIVYKPVDSLK     | 990.5496     | 1,979.08           | 2      | 3.50E+08 | IGSLDNITHVPGGGNK        | 789.9166     | 1,577.82           | 2      | 889692   |
| HVPGGGSVQIVYKPVDSLK     | 660.707      | 1,979.10           | 3      | 2223410  | IGSLDNITHVPGGGNK        | 526.9468     | 1,577.82           | 3      | 3380620  |
| HVPGGGSVQIVYKPVDSLK     | 495.7791     | 1,979.09           | 4      | 4140980  | IGSLDNITHVPGGGNK        | 526.9499     | 1,577.83           | 3      | 1899070  |
| HVPGGGSVQIVYKPVDSLK     | 660.7019     | 1,979.08           | 3      | 1.89E+07 | IGSLDNITHVPGGGNK        | 526.9486     | 1,577.82           | 3      | 2689600  |
| HVPGGGSVQIVYKPVDSLK     | 495.7818     | 1,979.10           | 4      | 693787   | IGSLDNITHVPGGGNK        | 789.9147     | 1,577.81           | 2      | 2997430  |
| HVPGGGSVQIVYKPVDSLK     | 660.7065     | 1,979.10           | 3      | 2884480  | IGSLDNITHVPGGGNK        | 526.9478     | 1,577.82           | 3      | 4.87E+07 |
| HVPGGGSVQIVYKPVDSLK     | 660.7054     | 1,979.09           | 3      | 4776200  | IGSLDNITHVPGGGNK        | 526.9464     | 1,577.82           | 3      | 3526230  |
| HVPGGGSVQIVYKPVDSLK     | 495.7782     | 1,979.08           | 4      | 2.81E+07 | IGSLDNITHVPGGGNK        | 526.9468     | 1,577.82           | 3      | 6623530  |
| HVPGGGSVQIVYKPVDSLK     | 495.781      | 1,979.09           | 4      | 1361110  | IGSLDNITHVPGGGNK        | 526.948      | 1,577.82           | 3      | 2208650  |
| HVPGGGSVQIVYKPVDSLK     | 660.706      | 1,979.10           | 3      | 2744780  | IGSLDNITHVPGGGNK        | 526.9481     | 1,577.82           | 3      | 5383120  |
| HVPGGGSVQIVYKPVDSLK     | 660.7045     | 1,979.09           | 3      | 9240940  | IGSLDNITHVPGGGNK        | 526.9467     | 1,577.82           | 3      | 4841190  |
| HVPGGGSVQIVYKPVDSLK     | 495.7788     | 1,979.09           | 4      | 793429   | IGSLDNITHVPGGGNK        | 526.9462     | 1,577.82           | 3      | 2.41E+07 |
| HVPGGGSVQIVYKPVDSLK     | 660.7033     | 1,979.09           | 3      | 1.32E+07 | IGSLDNITHVPGGGNK        | 526.948      | 1,577.82           | 3      | 1.15E+08 |
| HVPGGGSVQIVYKPVDSLK     | 495.7794     | 1,979.09           | 4      | 1.22E+07 | IGSLDNITHVPGGGNK        | 526.9489     | 1,577.82           | 3      | 1.03E+07 |
| HVPGGGSVQIVYKPVDSLK     | 495.7797     | 1,979.09           | 4      | 1596920  | IGSLDNITHVPGGGNK        | 526.9501     | 1,577.83           | 3      | 1713510  |
| HVPGGGSVQIVYKPVDSLK     | 660.7037     | 1,979.09           | 3      | 4333350  | IGSLDNITHVPGGGNK        | 526.9457     | 1,577.82           | 3      | 4650700  |
| HVPGGGSVQIVYKPVDSLK     | 990.5502     | 1,979.09           | 2      | 406341   | IGSLDNITHVPGGGNK        | 526.9487     | 1,577.82           | 3      | 1656710  |
| HVPGGGSVQIVYKPVDSLK     | 660.7068     | 1,979.10           | 3      | 4017330  | IGSLDNITHVPGGGNK        | 789.9152     | 1,577.82           | 2      | 2125410  |
| HVPGGGSVQIVYKPVDSLK     | 495.779      | 1,979.09           | 4      | 8845590  | IGSLDNITHVPGGGNK        | 526.9503     | 1,577.83           | 3      | 1577080  |
| HVPGGGSVQIVYKPVDSLK     | 495.7822     | 1,979.10           | 4      | 594417   | IGSLDNITHVPGGGNK        | 526.9464     | 1,577.82           | 3      | 9456110  |
| HVPGGGSVQIVYKPVDSLK     | 495.7813     | 1,979.10           | 4      | 658746   | IGSLDNITHVPGGGNK        | 526.95       | 1,577.83           | 3      | 1738300  |

| Sequence                  | Observed m/z | Absolute mass (Da) | Charge | TIC      | Sequence                                             | Observed m/z | Absolute mass (Da) | Charge | TIC      |
|---------------------------|--------------|--------------------|--------|----------|------------------------------------------------------|--------------|--------------------|--------|----------|
| IGSLDNITHVPGGGNK          | 526.9491     | 1,577.83           | 3      | 1155100  | SEKLDKDRVQSK                                         | 395.7166     | 1,578.84           | 4      | 1045490  |
| IGSLDNITHVPGGGNK          | 526.9484     | 1,577.82           | 3      | 221418   | SPVVSVDTSRPHLSNVSSSTGSDIMVDSPLATLADEVASLAK           | 1,448.05     | 4,341.14           | 3      | 5789350  |
| IGSLDNITHVPGGGNK          | 526.9493     | 1,577.83           | 3      | 286334   | SPVVSVDTSRPHLSNVSSSTGSDIMVDSPLATLADEVASLAK           | 1,086.30     | 4,341.14           | 4      | 3540890  |
| IGSLDNITHVPGGGNK          | 526.9454     | 1,577.81           | 3      | 5477080  | SPVVSVDTSRPHLSNVSSSTGSDIMVDSPLATLADEVASLAK           | 869.2347     | 4,341.14           | 5      | 7381630  |
| IGSLDNITHVPGGGNK          | 526.9497     | 1,577.83           | 3      | 2062070  | TDHGAEIVYK                                           | 566.7853     | 1,131.56           | 2      | 2.79E+08 |
| IGSLDNITHVPGGGNK          | 526.9471     | 1,577.82           | 3      | 2340520  | TDHGAEIVYK                                           | 566.7865     | 1,131.56           | 2      | 5572430  |
| IGSLDNITHVPGGGNK          | 526.9483     | 1,577.82           | 3      | 2040250  | TDHGAEIVYK                                           | 378.1934     | 1,131.56           | 3      | 2524120  |
| IGSLDNITHVPGGGNK          | 789.9179     | 1,577.82           | 2      | 1253410  | TDHGAEIVYK                                           | 378.1937     | 1,131.56           | 3      | 1684140  |
| IGSLDNITHVPGGGNK          | 789.9111     | 1,577.81           | 2      | 1343070  | TDHGAEIVYK                                           | 378.1937     | 1,131.56           | 3      | 1289780  |
| IGSLDNITHVPGGGNK          | 526.9494     | 1,577.83           | 3      | 166880   | TDHGAEIVYK                                           | 378.1925     | 1,131.56           | 3      | 4498190  |
| IGSLDNITHVPGGGNK          | 526.9495     | 1,577.83           | 3      | 321867   | TDHGAEIVYK                                           | 378.1926     | 1,131.56           | 3      | 1391590  |
| IGSLDNITHVPGGGNK          | 853.964      | 1,705.91           | 2      | 1.66E+07 | TDHGAEIVYK                                           | 378.1935     | 1,131.56           | 3      | 1948310  |
| IGSLDNITHVPGGGNK          | 853.9636     | 1,705.91           | 2      | 3424590  | TDHGAEIVYK                                           | 378.1924     | 1,131.56           | 3      | 672651   |
| IGSLDNITHVPGGGNK          | 569.6451     | 1,705.91           | 3      | 1.05E+08 | TDHGAEIVYK                                           | 566.7853     | 1,131.56           | 2      | 6059200  |
| IGSLDNITHVPGGGNK          | 569.6451     | 1,705.91           | 3      | 8.15E+08 | TDHGAEIVYK                                           | 566.7852     | 1,131.56           | 2      | 2.88E+07 |
| IGSLDNITHVPGGGNK          | 853.9622     | 1,705.91           | 2      | 1052510  | TDHGAEIVYK                                           | 378.1931     | 1,131.56           | 3      | 3423510  |
| IGSLDNITHVPGGGNK          | 427.487      | 1,705.92           | 4      | 3.26E+07 | TDHGAEIVYK                                           | 566.7856     | 1,131.56           | 2      | 3038160  |
| IGSLDNITHVPGGGNK          | 427.4857     | 1,705.91           | 4      | 4857820  | TDHGAEIVYK                                           | 378.1936     | 1,131.56           | 3      | 1510270  |
| IGSLDNITHVPGGGNK          | 427.4857     | 1,705.91           | 4      | 897717   | TDHGAEIVYK                                           | 378.1924     | 1,131.56           | 3      | 5707550  |
| IGSLDNITHVPGGGNK          | 427.486      | 1,705.91           | 4      | 987470   | TDHGAEIVYK                                           | 566.7869     | 1,131.56           | 2      | 1789910  |
| IGSLDNITHVPGGGNK          | 427.4863     | 1,705.92           | 4      | 7266090  | TDHGAEIVYK                                           | 566.7855     | 1,131.56           | 2      | 1.23E+09 |
| IGSTENLK                  | 431.239      | 860.4635           | 2      | 4936660  | TDHGAEIVYK                                           | 378.1933     | 1,131.56           | 3      | 2052700  |
| IGSTENLKHQPGGGK           | 381.4567     | 1,521.80           | 4      | 428848   | TDHGAEIVYK                                           | 566.7878     | 1,131.56           | 2      | 606715   |
| KIETHKLTFRNAK             | 572.3261     | 1,713.96           | 3      | 2728970  | TDHGAEIVYK                                           | 378.1934     | 1,131.56           | 3      | 1.32E+07 |
| KIETHKLTFRNAK             | 429.4954     | 1,713.95           | 4      | 1568200  | TDHGAEIVYK                                           | 378.1928     | 1,131.56           | 3      | 796246   |
| KIETHKLTFRNAK             | 429.4954     | 1,713.95           | 4      | 1179910  | TDHGAEIVYK                                           | 378.194      | 1,131.56           | 3      | 1.24E+09 |
| KLDLSNVQSK                | 566.3237     | 1,130.63           | 2      | 6777390  | TDHGAEIVYK                                           | 378.1933     | 1,131.56           | 3      | 816200   |
| KLDLSNVQSK                | 377.8845     | 1,130.63           | 3      | 6797930  | TDHGAEIVYK                                           | 378.1932     | 1,131.56           | 3      | 1392660  |
| LDKDRVQSK                 | 618.3409     | 1,234.67           | 2      | 2709780  | TDHGAEIVYK                                           | 378.1932     | 1,131.56           | 3      | 899653   |
| LDKDRVQSK                 | 618.3421     | 1,234.67           | 2      | 4709350  | TDHGAEIVYK                                           | 566.7892     | 1,131.56           | 2      | 276842   |
| LDKDRVQSK                 | 618.3406     | 1,234.67           | 2      | 3.65E+07 | TDHGAEIVYK                                           | 566.7862     | 1,131.56           | 2      | 1995230  |
| LDKDRVQSK                 | 618.3407     | 1,234.67           | 2      | 2.44E+08 | TDHGAEIVYK                                           | 378.1941     | 1,131.56           | 3      | 725129   |
| LDKDRVQSK                 | 618.3415     | 1,234.67           | 2      | 2048270  | TDHGAEIVYK                                           | 378.1931     | 1,131.56           | 3      | 1147450  |
| LDKDRVQSK                 | 618.3406     | 1,234.67           | 2      | 590390   | TDHGAEIVYK                                           | 378.1928     | 1,131.56           | 3      | 793357   |
| LDKDRVQSK                 | 412.563      | 1,234.67           | 3      | 4055280  | TDHGAEIVYK                                           | 378.1926     | 1,131.56           | 3      | 4495100  |
| LDKDRVQSK                 | 412.565      | 1,234.67           | 3      | 1648240  | TDHGAEIVYK                                           | 566.7894     | 1,131.56           | 2      | 643479   |
| LDKDRVQSK                 | 412.5636     | 1,234.67           | 3      | 2329710  | TDHGAEIVYK                                           | 566.7849     | 1,131.56           | 2      | 2295400  |
| LDKDRVQSK                 | 412.5623     | 1,234.67           | 3      | 6494730  | TDHGAEIVYK                                           | 378.1934     | 1,131.56           | 3      | 2985250  |
| LDKDRVQSK                 | 412.5643     | 1,234.67           | 3      | 621133   | TDHGAEIVYK                                           | 566.7894     | 1,131.56           | 2      | 619166   |
| LDKDRVQSK                 | 412.5646     | 1,234.67           | 3      | 631690   | TDHGAEIVYK                                           | 566.7863     | 1,131.56           | 2      | 1401040  |
| LDKDRVQSK                 | 412.5642     | 1,234.67           | 3      | 605167   | TDHGAEIVYK                                           | 378.1931     | 1,131.56           | 3      | 1147240  |
| LDKDRVQSK                 | 412.5644     | 1,234.67           | 3      | 1714350  | TDHGAEIVYK                                           | 378.1939     | 1,131.56           | 3      | 1067540  |
| LDKDRVQSK                 | 412.5627     | 1,234.67           | 3      | 8990510  | TDHGAEIVYK                                           | 566.787      | 1,131.56           | 2      | 1621820  |
| LDKDRVQSK                 | 412.5637     | 1,234.67           | 3      | 1405350  | TDHGAEIVYK                                           | 378.1934     | 1,131.56           | 3      | 828802   |
| LDKDRVQSKIGSLDNITHVPGGGNK | 699.6224     | 2,794.46           | 4      | 2945180  | TDHGAEIVYK                                           | 378.193      | 1,131.56           | 3      | 791990   |
| LDKDRVQSKIGSLDNITHVPGGGNK | 699.6266     | 2,794.48           | 4      | 1.04E+07 | TDHGAEIVYK                                           | 378.1919     | 1,131.56           | 3      | 873625   |
| LDLSNVQSK                 | 502.2763     | 1,002.54           | 2      | 1.49E+08 | TDHGAEIVYK                                           | 378.1946     | 1,131.56           | 3      | 856211   |
| LDLSNVQSK                 | 502.2764     | 1,002.54           | 2      | 3602480  | TDHGAEIVYK                                           | 378.1934     | 1,131.56           | 3      | 937579   |
| LDLSNVQSK                 | 502.2762     | 1,002.54           | 2      | 2210260  | TDHGAEIVYK                                           | 566.788      | 1,131.56           | 2      | 1283420  |
| LTFRENAK                  | 489.7738     | 977.533            | 2      | 1.10E+09 | TDHGAEIVYK                                           | 378.1931     | 1,131.56           | 3      | 1210650  |
| LTFRENAK                  | 489.7716     | 977.5286           | 2      | 1.52E+07 | TDHGAEIVYK                                           | 566.7864     | 1,131.56           | 2      | 222469   |
| LTFRENAK                  | 489.7725     | 977.5305           | 2      | 2.51E+08 | TDHGAEIVYK                                           | 378.1927     | 1,131.56           | 3      | 656860   |
| LTFRENAK                  | 489.7747     | 977.5348           | 2      | 2271510  | TDHGAEIVYK                                           | 378.1929     | 1,131.56           | 3      | 674648   |
| LTFRENAK                  | 489.7745     | 977.5345           | 2      | 925989   | TDHGAEIVYK                                           | 378.1915     | 1,131.56           | 3      | 646219   |
| LTFRENAK                  | 489.7739     | 977.5332           | 2      | 484169   | TDHGAEIVYK                                           | 378.1924     | 1,131.56           | 3      | 868838   |
| LTFRENAK                  | 489.7726     | 977.5306           | 2      | 286652   | TDHGAEIVYK                                           | 378.1935     | 1,131.56           | 3      | 652849   |
| LTFRENAK                  | 489.7739     | 977.5332           | 2      | 467440   | TDHGAEIVYK                                           | 378.193      | 1,131.56           | 3      | 1234380  |
| LTFRENAK                  | 489.7727     | 977.5308           | 2      | 428820   | TDHGAEIVYK                                           | 378.1936     | 1,131.56           | 3      | 1078030  |
| LTFRENAK                  | 489.7749     | 977.5352           | 2      | 396975   | TDHGAEIVYK                                           | 378.1939     | 1,131.56           | 3      | 846087   |
| LTFRENAK                  | 489.7744     | 977.5343           | 2      | 313402   | TDHGAEIVYK                                           | 378.1937     | 1,131.56           | 3      | 788023   |
| LTFRENAK                  | 489.7719     | 977.5292           | 2      | 4153020  | TDHGAEIVYK                                           | 378.1934     | 1,131.56           | 3      | 820444   |
| LTFRENAK                  | 489.7743     | 977.5341           | 2      | 556436   | TDHGAEIVYK                                           | 378.1934     | 1,131.56           | 3      | 4.24E+08 |
| LTFRENAK                  | 489.7764     | 977.5382           | 2      | 343102   | TDHGAEIVYK                                           | 378.1934     | 1,131.56           | 3      | 7208060  |
| LTFRENAK                  | 489.7726     | 977.5306           | 2      | 325833   | TDHGAEIVYK                                           | 566.786      | 1,131.56           | 2      | 1689280  |
| LTFRENAK                  | 489.7721     | 977.5296           | 2      | 1304710  | TDHGAEIVYK                                           | 378.1951     | 1,131.56           | 3      | 1187870  |
| LTFRENAK                  | 489.7716     | 977.5287           | 2      | 1926160  | TDHGAEIVYK                                           | 378.1952     | 1,131.56           | 3      | 700429   |
| LTFRENAK                  | 489.7726     | 977.5306           | 2      | 494865   | TDHGAEIVYK                                           | 378.1929     | 1,131.56           | 3      | 805639   |
| LTFRENAK                  | 489.7729     | 977.5312           | 2      | 668740   | TDHGAEIVYK                                           | 378.1937     | 1,131.56           | 3      | 994250   |
| LTFRENAKAK                | 589.3387     | 1,176.66           | 2      | 1.17E+07 | TDHGAEIVYK                                           | 378.1927     | 1,131.56           | 3      | 648024   |
| LTFRENAKAKTDHGAEIVYK      | 573.5607     | 2,290.21           | 4      | 7300470  | TDHGAEIVYK                                           | 566.7864     | 1,131.56           | 2      | 795048   |
| SEKLDKDRVQSK              | 790.4258     | 1,578.84           | 2      | 862065   | TDHGAEIVYK                                           | 378.1926     | 1,131.56           | 3      | 675877   |
| SEKLDKDRVQSK              | 527.2865     | 1,578.84           | 3      | 4558580  | TDHGAEIVYK                                           | 566.7859     | 1,131.56           | 2      | 355248   |
| SEKLDKDRVQSK              | 527.2872     | 1,578.84           | 3      | 5798240  | TDHGAEIVYKSPVVSVDTSRPHLSNVSSSTGSDIMVDSPLATLADEVASLAK | 1,091.95     | 5,454.70           | 5      | 4.77E+07 |
|                           |              |                    |        |          | TDHGAEIVYKSPVVSVDTSRPHLSNVSSSTGSDIMVDSPLATLADEVASLAK | 907.4586     | 5,438.71           | 6      | 5919710  |
|                           |              |                    |        |          | TDHGAEIVYKSPVVSVDTSRPHLSNVSSSTGSDIMVDSPLATLADEVASLAK | 1,088.75     | 5,438.72           | 5      | 600274   |

**Supplementary Fig. 3** | Details of the peptides detected (shown in Fig. 2c, orange) by enzymatic digestion of the trypsin protected core (Fig. 2b) of heparin-free 2N4R tau fibrils.

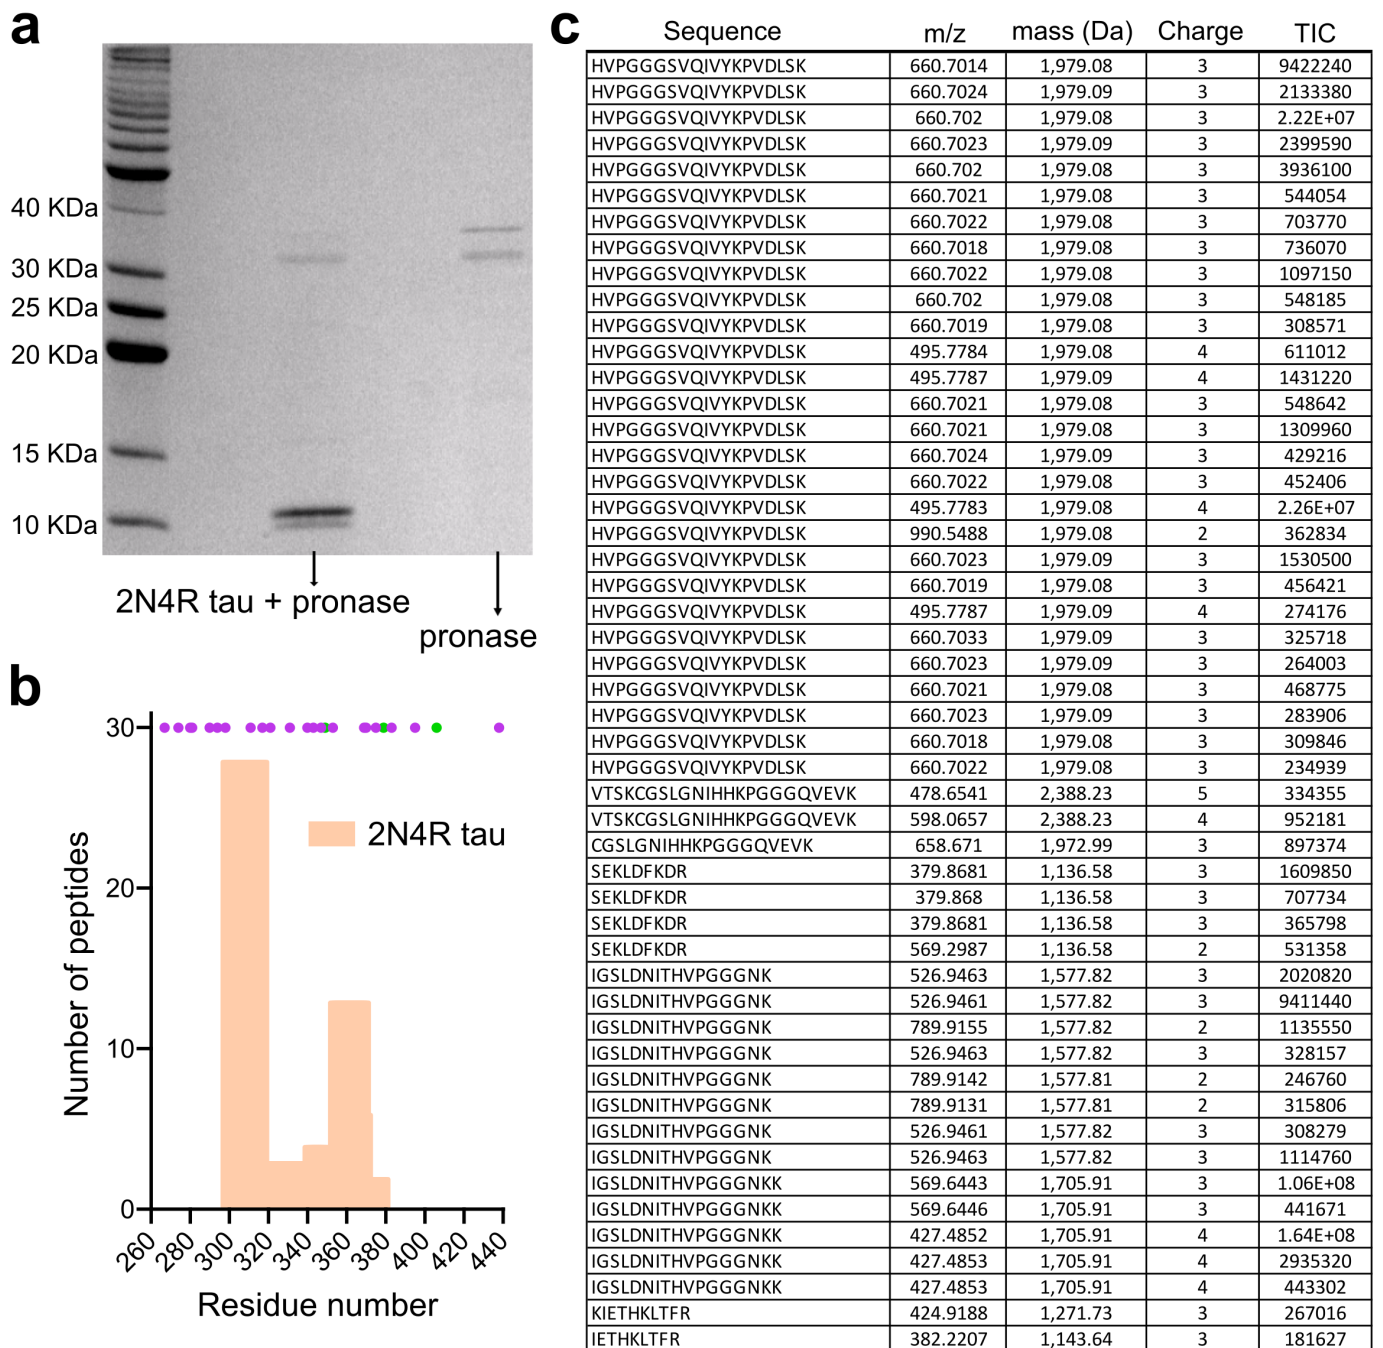

**Supplementary Fig. 4 | Pronase-resistant core of heparin-free 2N4R tau fibrils.** **a**, SDS-PAGE gel of pronase-digested tau fibrils formed in the absence of heparin. The pronase band is indicated in a separate lane. The result was reproducible for three independently performed experiments. **b**, Number of peptides detected from the enzymatic digestion of the tau band observed in SDS-PAGE in (a). The position of lysine and arginine residues in 2N4R tau are marked with purple and green dots, respectively. **c**, Details of the peptides detected as shown in (b).

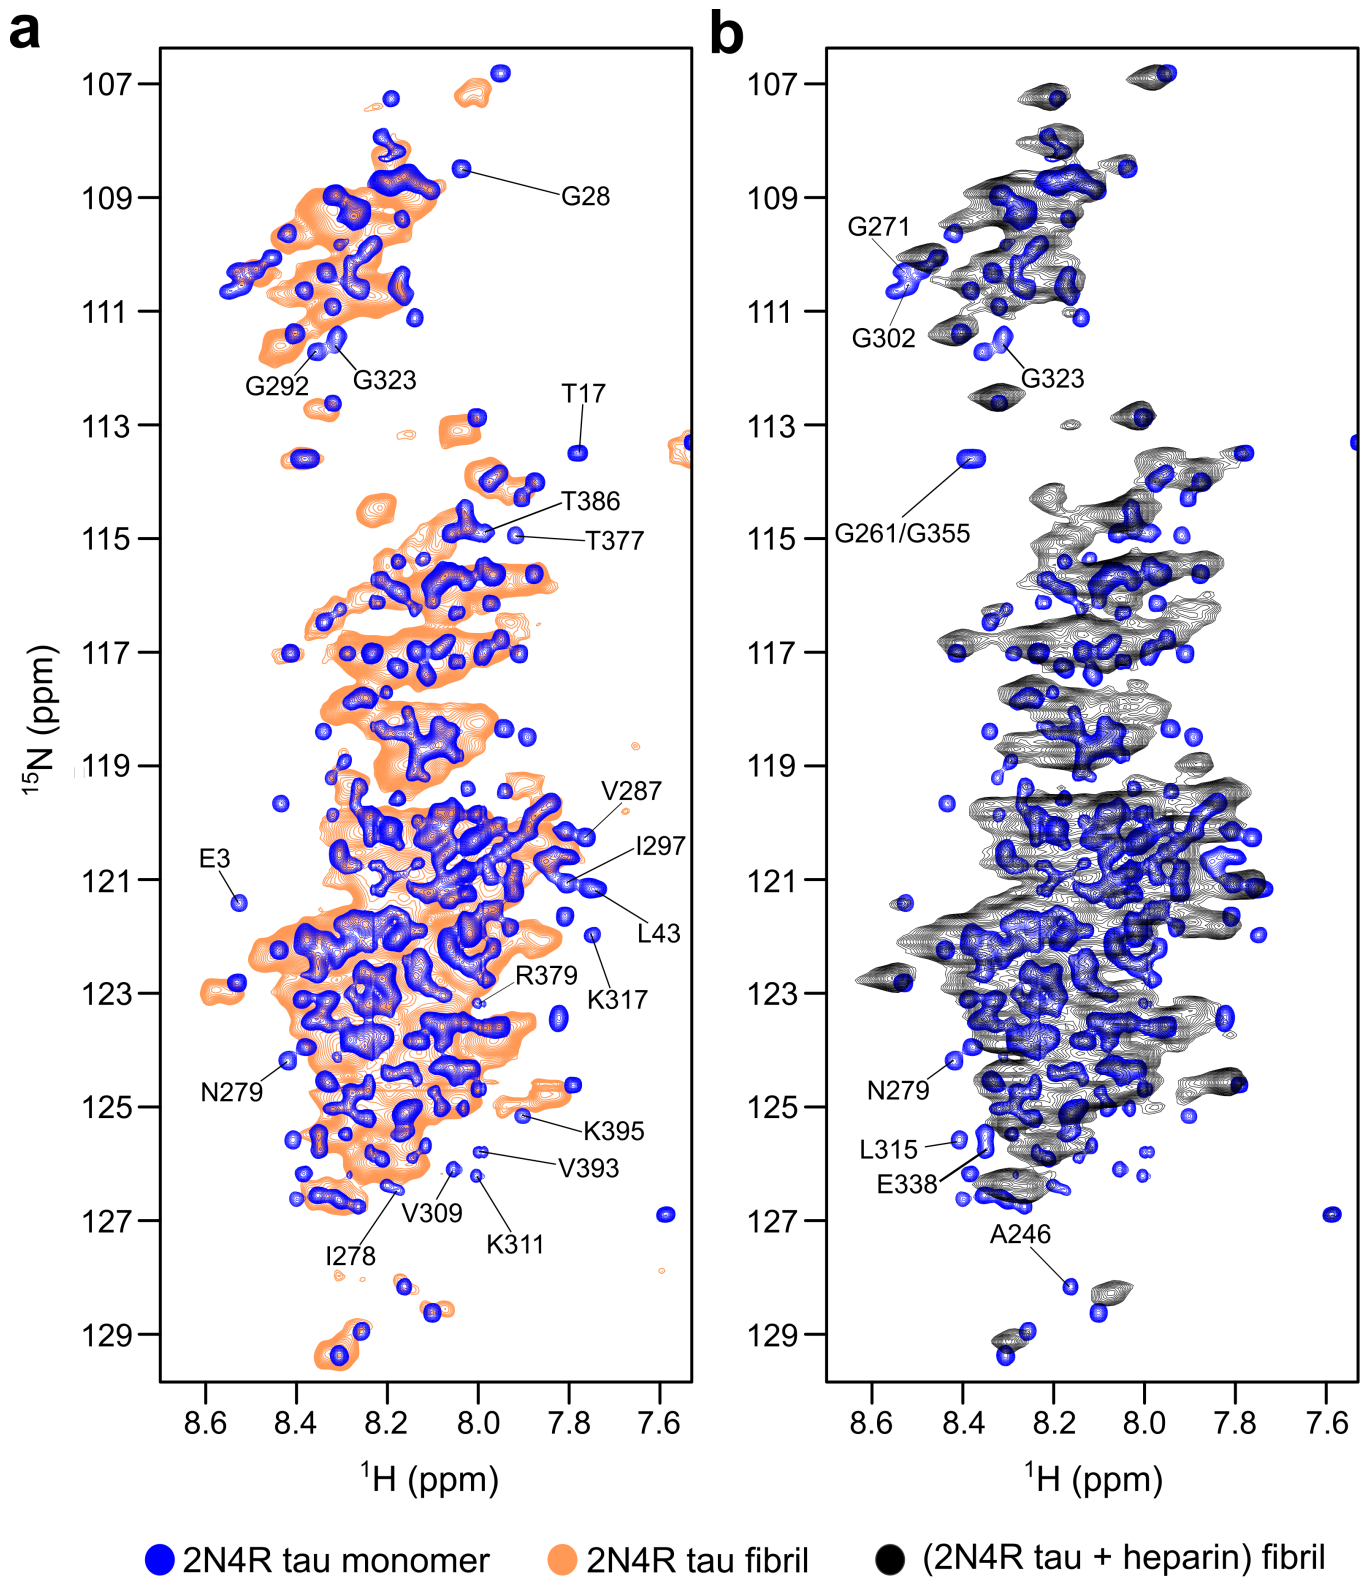

**Supplementary Fig. 5** | Superposition of the  $^1\text{H}$ - $^{15}\text{N}$  HSQC spectrum of monomeric 2N4R tau (blue) with  $^1\text{H}$ - $^{15}\text{N}$  INEPT spectra of heparin-free 2N4R fibrils (orange; left) and heparin-induced fibrils of 2N4R tau (black; right).



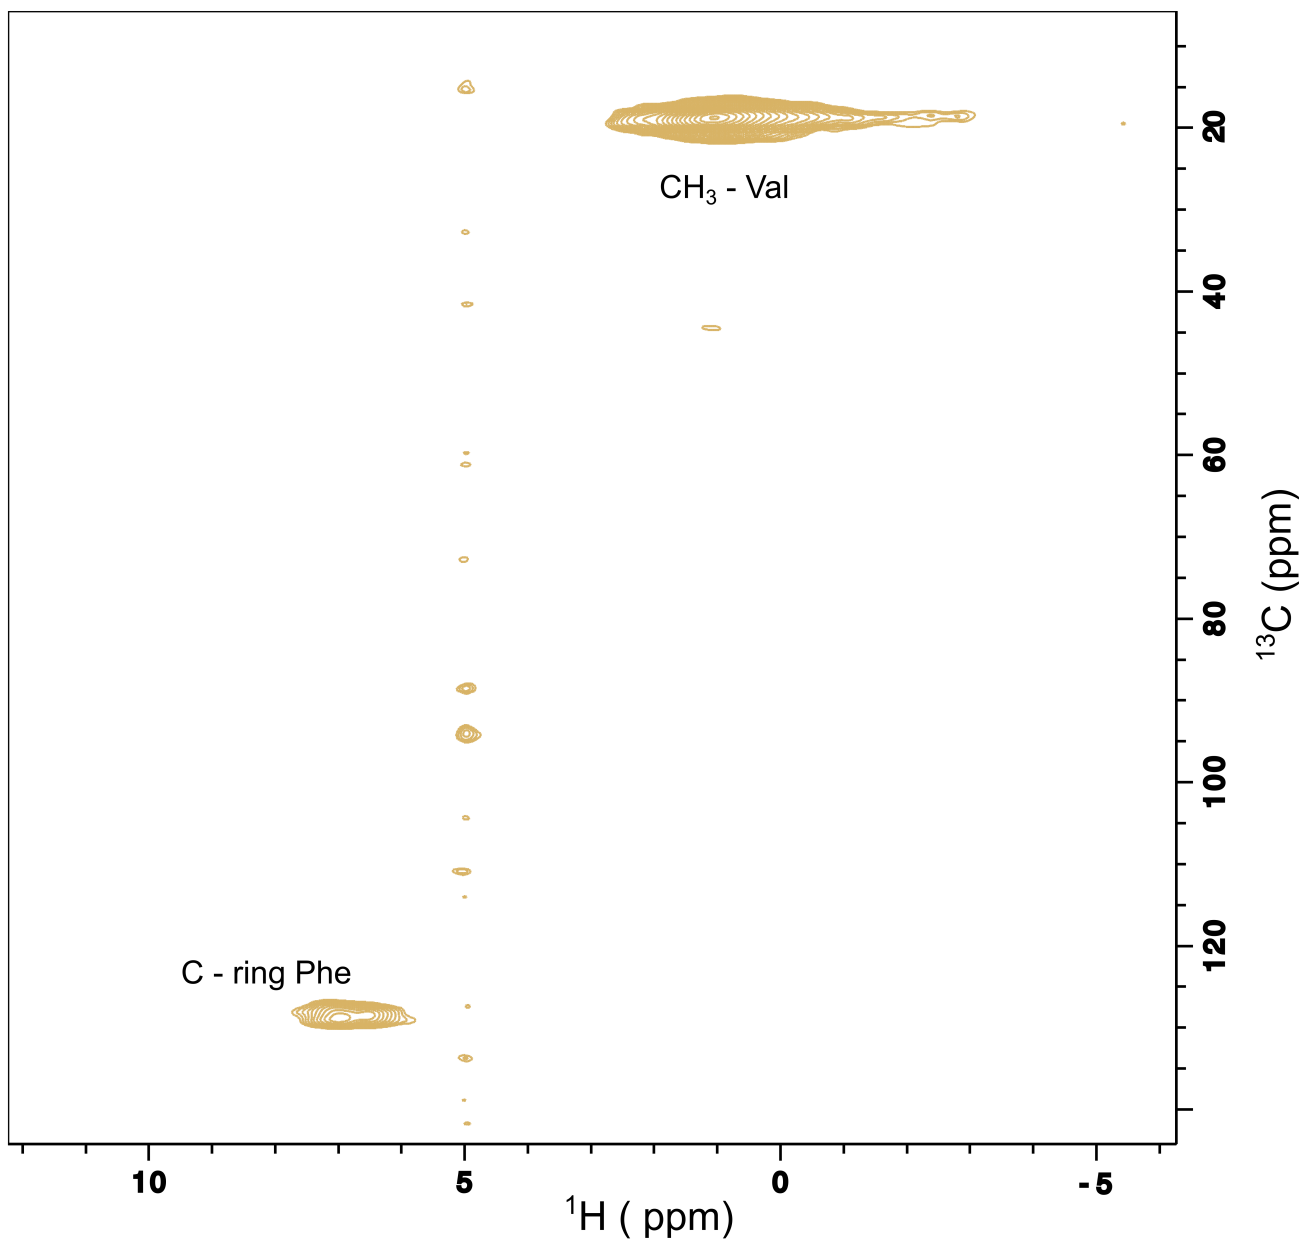

**Supplementary Fig. 6** | 2D hCH spectra of heparin-free fibrils of  $^{13}\text{C}_\gamma$  valine,  $^{13}\text{C}$ -ring phenylalanine-labeled 2N4R tau.

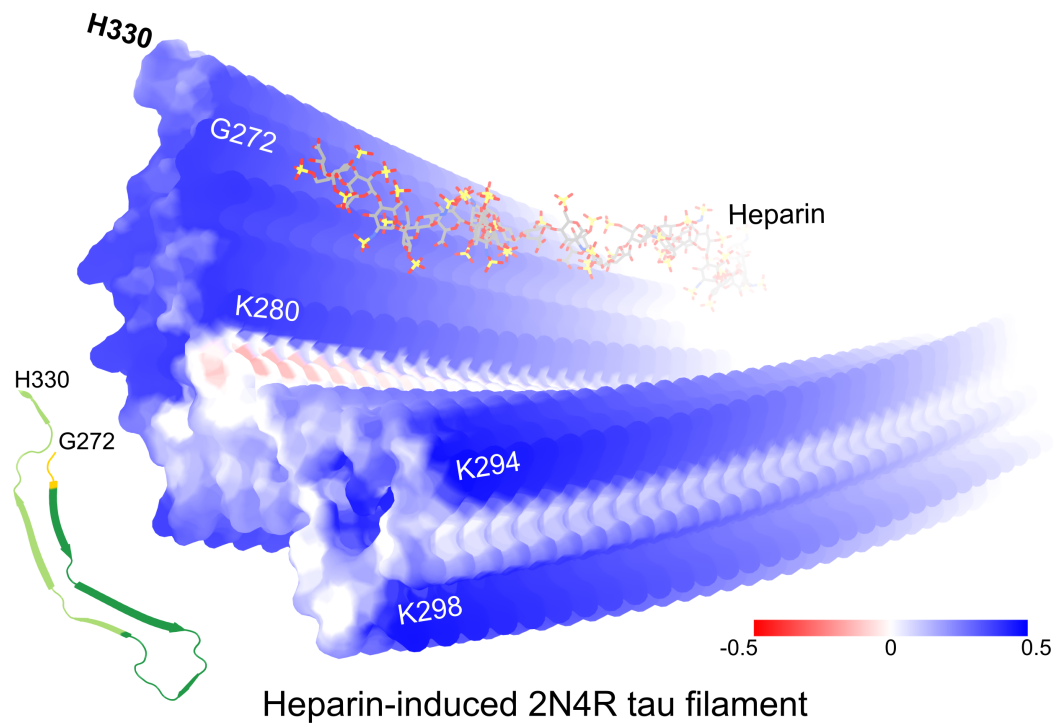

**Supplementary Fig. 7** | Electrostatic surface potential of the heparin-induced 2N4R tau fibrils (snake form; PDB code: 6QJH). Positively and negatively charged residues are shown in blue and red, respectively. A molecule of heparin is displayed to illustrate the presence of heparin on the surface of the fibril.
